# Supplementary material
Source: Springer Nature journal article supplement (https://www.springermedizin.de/resource/supplementary/12905_2010_220_MOESM3_ESM.pdf/9518330)
Supplement: MOESM3 [file 9518330]

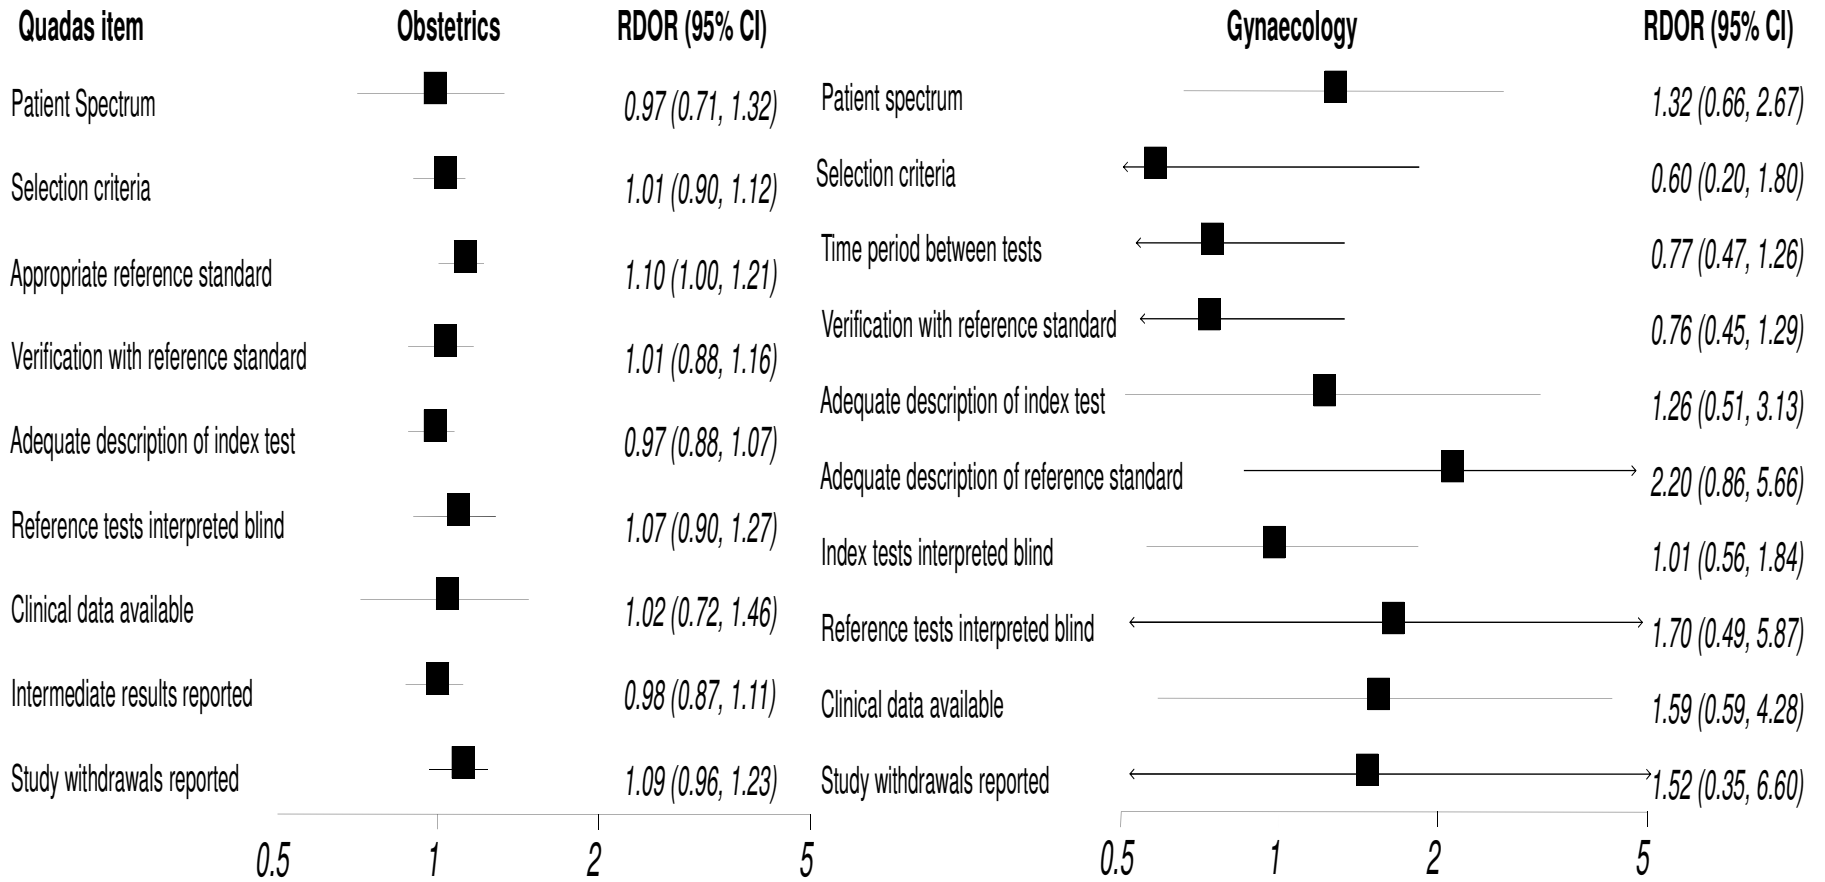

Obstetrics: Independent reference standard – constant compliance; time period between tests, all patients receiving same reference standard, index tests interpreted blind – colinearity. Gynaecology: appropriate reference standard, all patients receiving same reference standard, independent reference standard – constant compliance; intermediate results reported – colinearity.

(Colinearity – mathematical problem which impedes adequate estimation of coefficients in model due to two or more variables that are correlated)

RDOR ratio of diagnostic odds ratio      CI confidence interval
